# Supplementary material for: Uncompatibilized PBAT/PLA Blends: Manufacturability, Miscibility and Properties
Source: PubMed Central journal article supplement (PMC7662590; doi:10.3390/ma13214897), 2020-10-31
Supplement: materials-13-04897-s001.pdf [file materials-13-04897-s001.pdf]

## Supplementary Materials

# Uncompatibilized PBAT/PLA Blends: Manufacturability, Miscibility and Properties

Shen Su <sup>1,2,\*</sup>, Mona Duhme <sup>1</sup> and Rodion Kopitzky <sup>1</sup>

<sup>1</sup> Department of Circular and Bio-based Plastics, Fraunhofer UMSICHT, Institute for Environment, Safety and Energy Technology, Osterfelder Str. 3, 46047 Oberhausen, Germany; mona.duhme@umsicht.fraunhofer.de (M.D.); rodion.kopitzky@umsicht.fraunhofer.de (R.K.)

<sup>2</sup> Department of Mechanical Engineering, Ruhr-University Bochum, Universitaetsstr. 150, 44780 Bochum, Germany

\* Correspondence: shen.su@umsicht.fraunhofer.de; Tel. +49-208-85981422

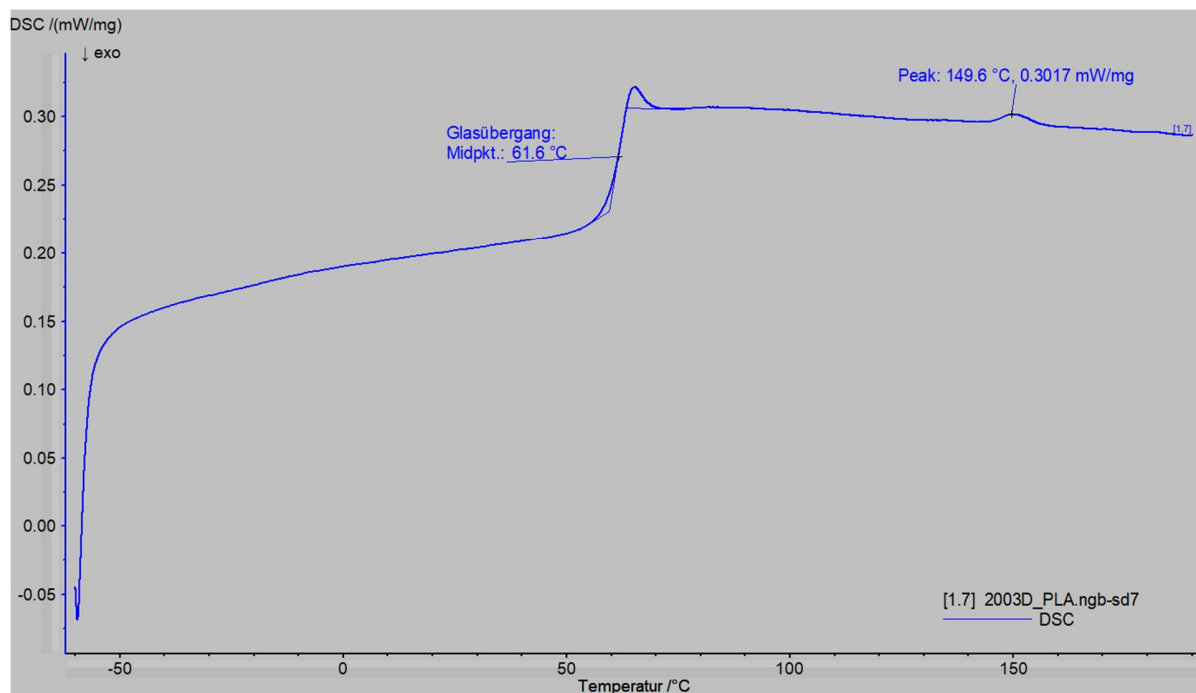

Figure S1. DSC of pure PLA analyzed by the software Netzsch Proteus Thermal analysis

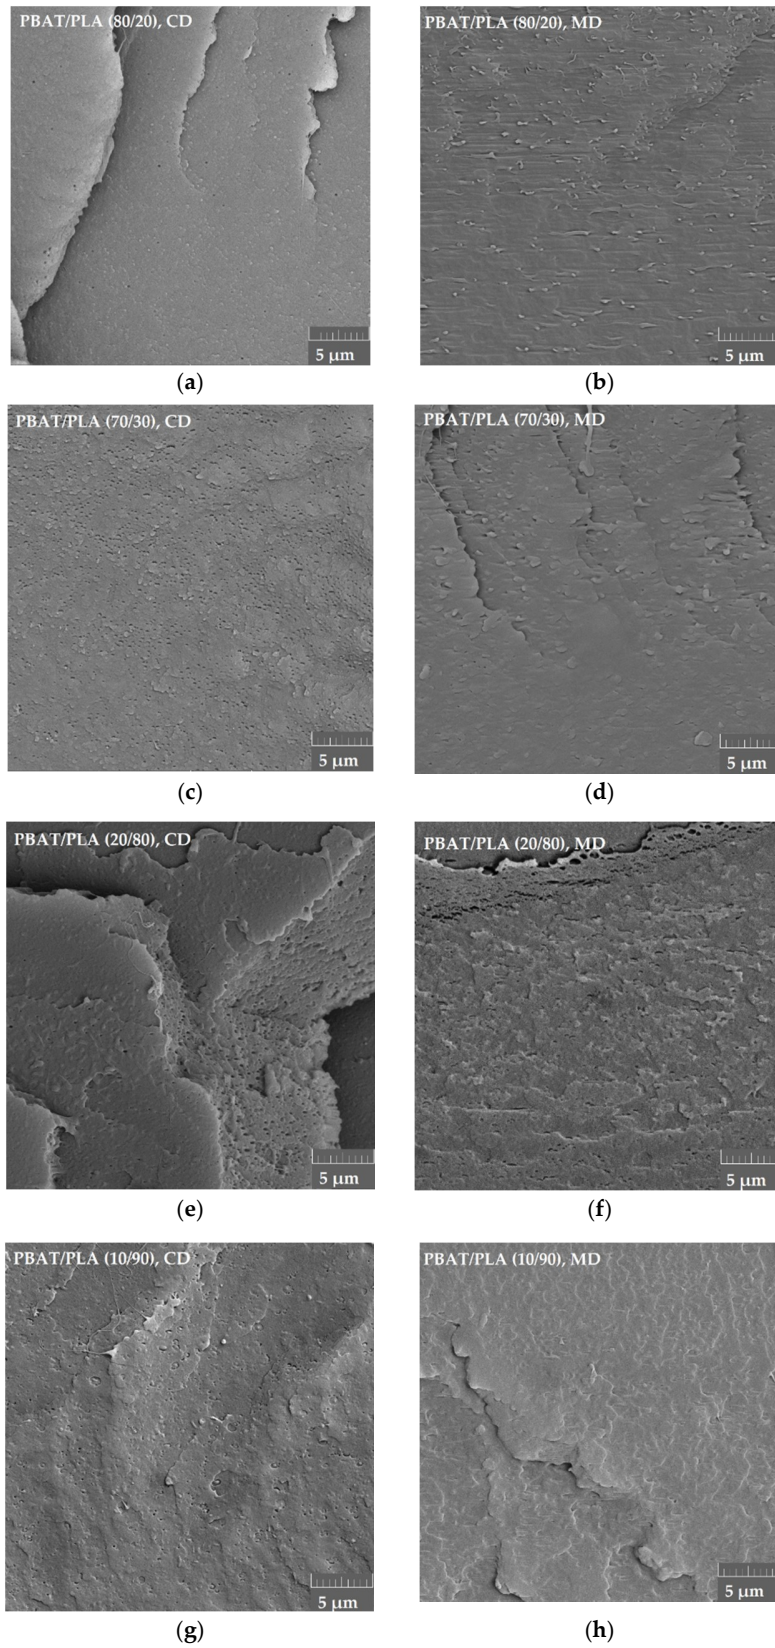

Figure S2. SEM of further flat films made of PBAT/PLA blends: (a) (80/20) in CD, (b) (80/20) in MD, (c) (70/30) in CD, (d) (70/30) in MD, (e) (20/80) in CD, (f) (20/80) in MD, (g) (10/90) in CD, (h) (10/90) in MD.
